# Supplementary material for: Multiomics analysis reveals CT83 is the most specific gene for triple negative breast cancer and its hypomethylation is oncogenic in breast cancer
Source: PubMed Central journal article supplement (PMC8190062; doi:10.1038/s41598-021-91290-4), 2021-06-09
Supplement: 41598_2021_91290_MOESM1_ESM.pdf [file 41598_2021_91290_MOESM1_ESM.pdf]

# **Multionics analysis reveals CT83 is the most specific gene for triple negative breast cancer and its hypomethylation is oncogenic in breast cancer**

Chen Chen, Dan Gao, Jinlong Huo, Rui Qu, Youming Guo, Xiaochi Hu, Libo Luo

---

## **Supplementary Figures and Tables**

# Figure S1

## Expression of CT83 in different types of blood cells

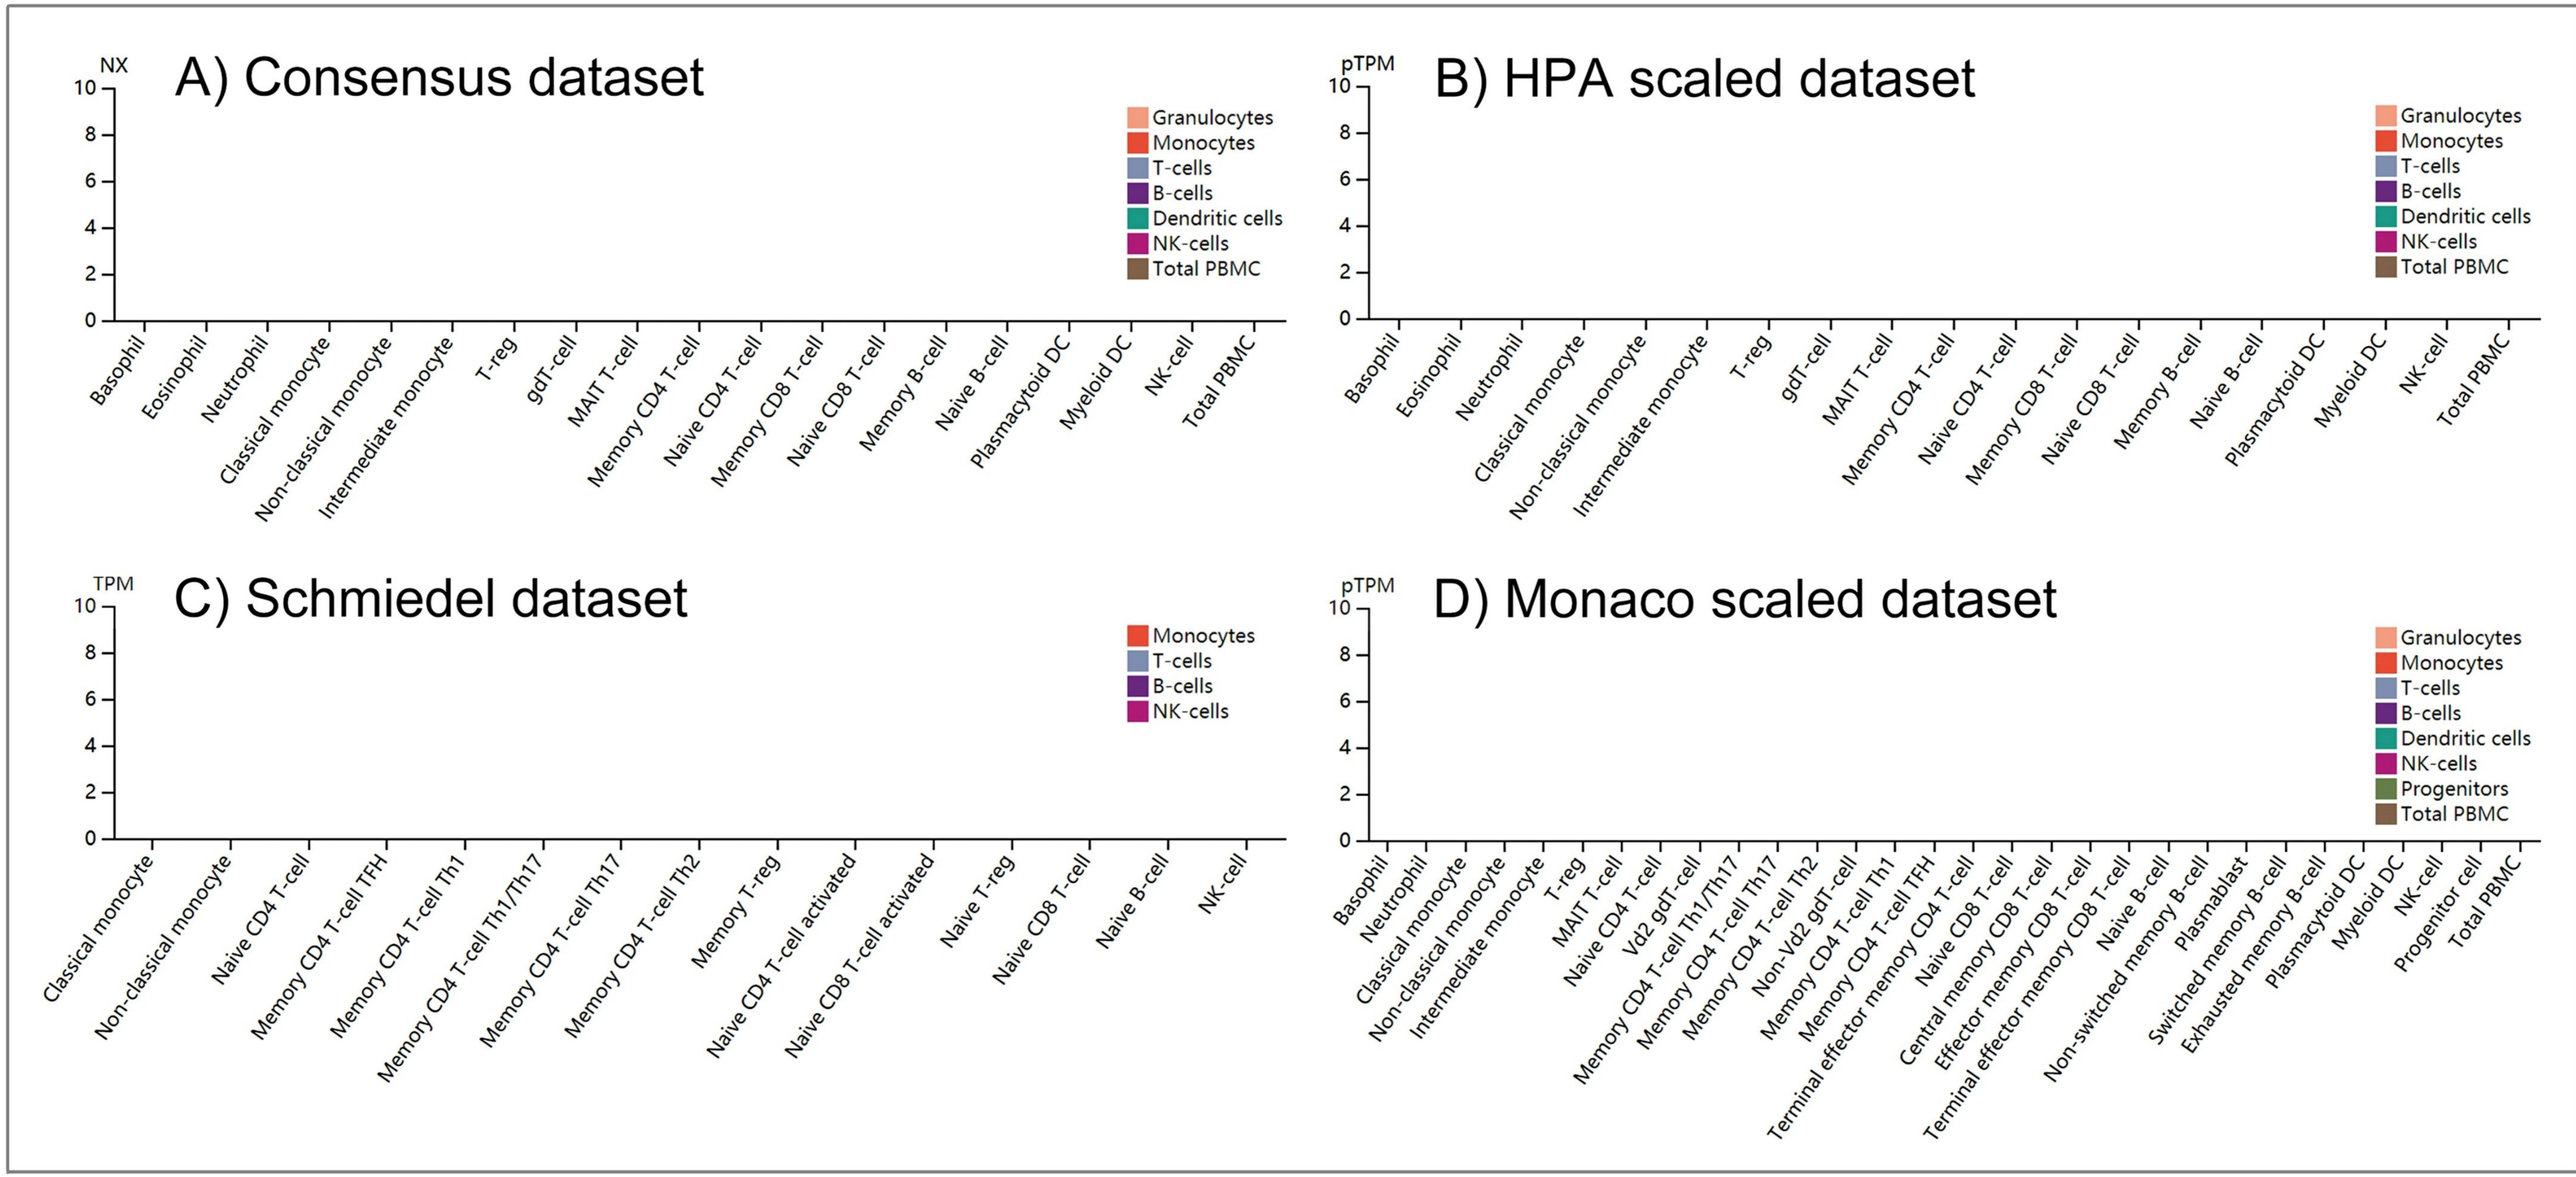

Data were integrated based on the 4 datasets of gene expression in blood cells obtained from the Human Protein Atlas database.

<https://www.proteinatlas.org/ENSG00000204019-CT83/blood>

**Figure S2**

**Spearman's correlation coefficient between  
CT83 expression and immune infiltration in pan-cancer**

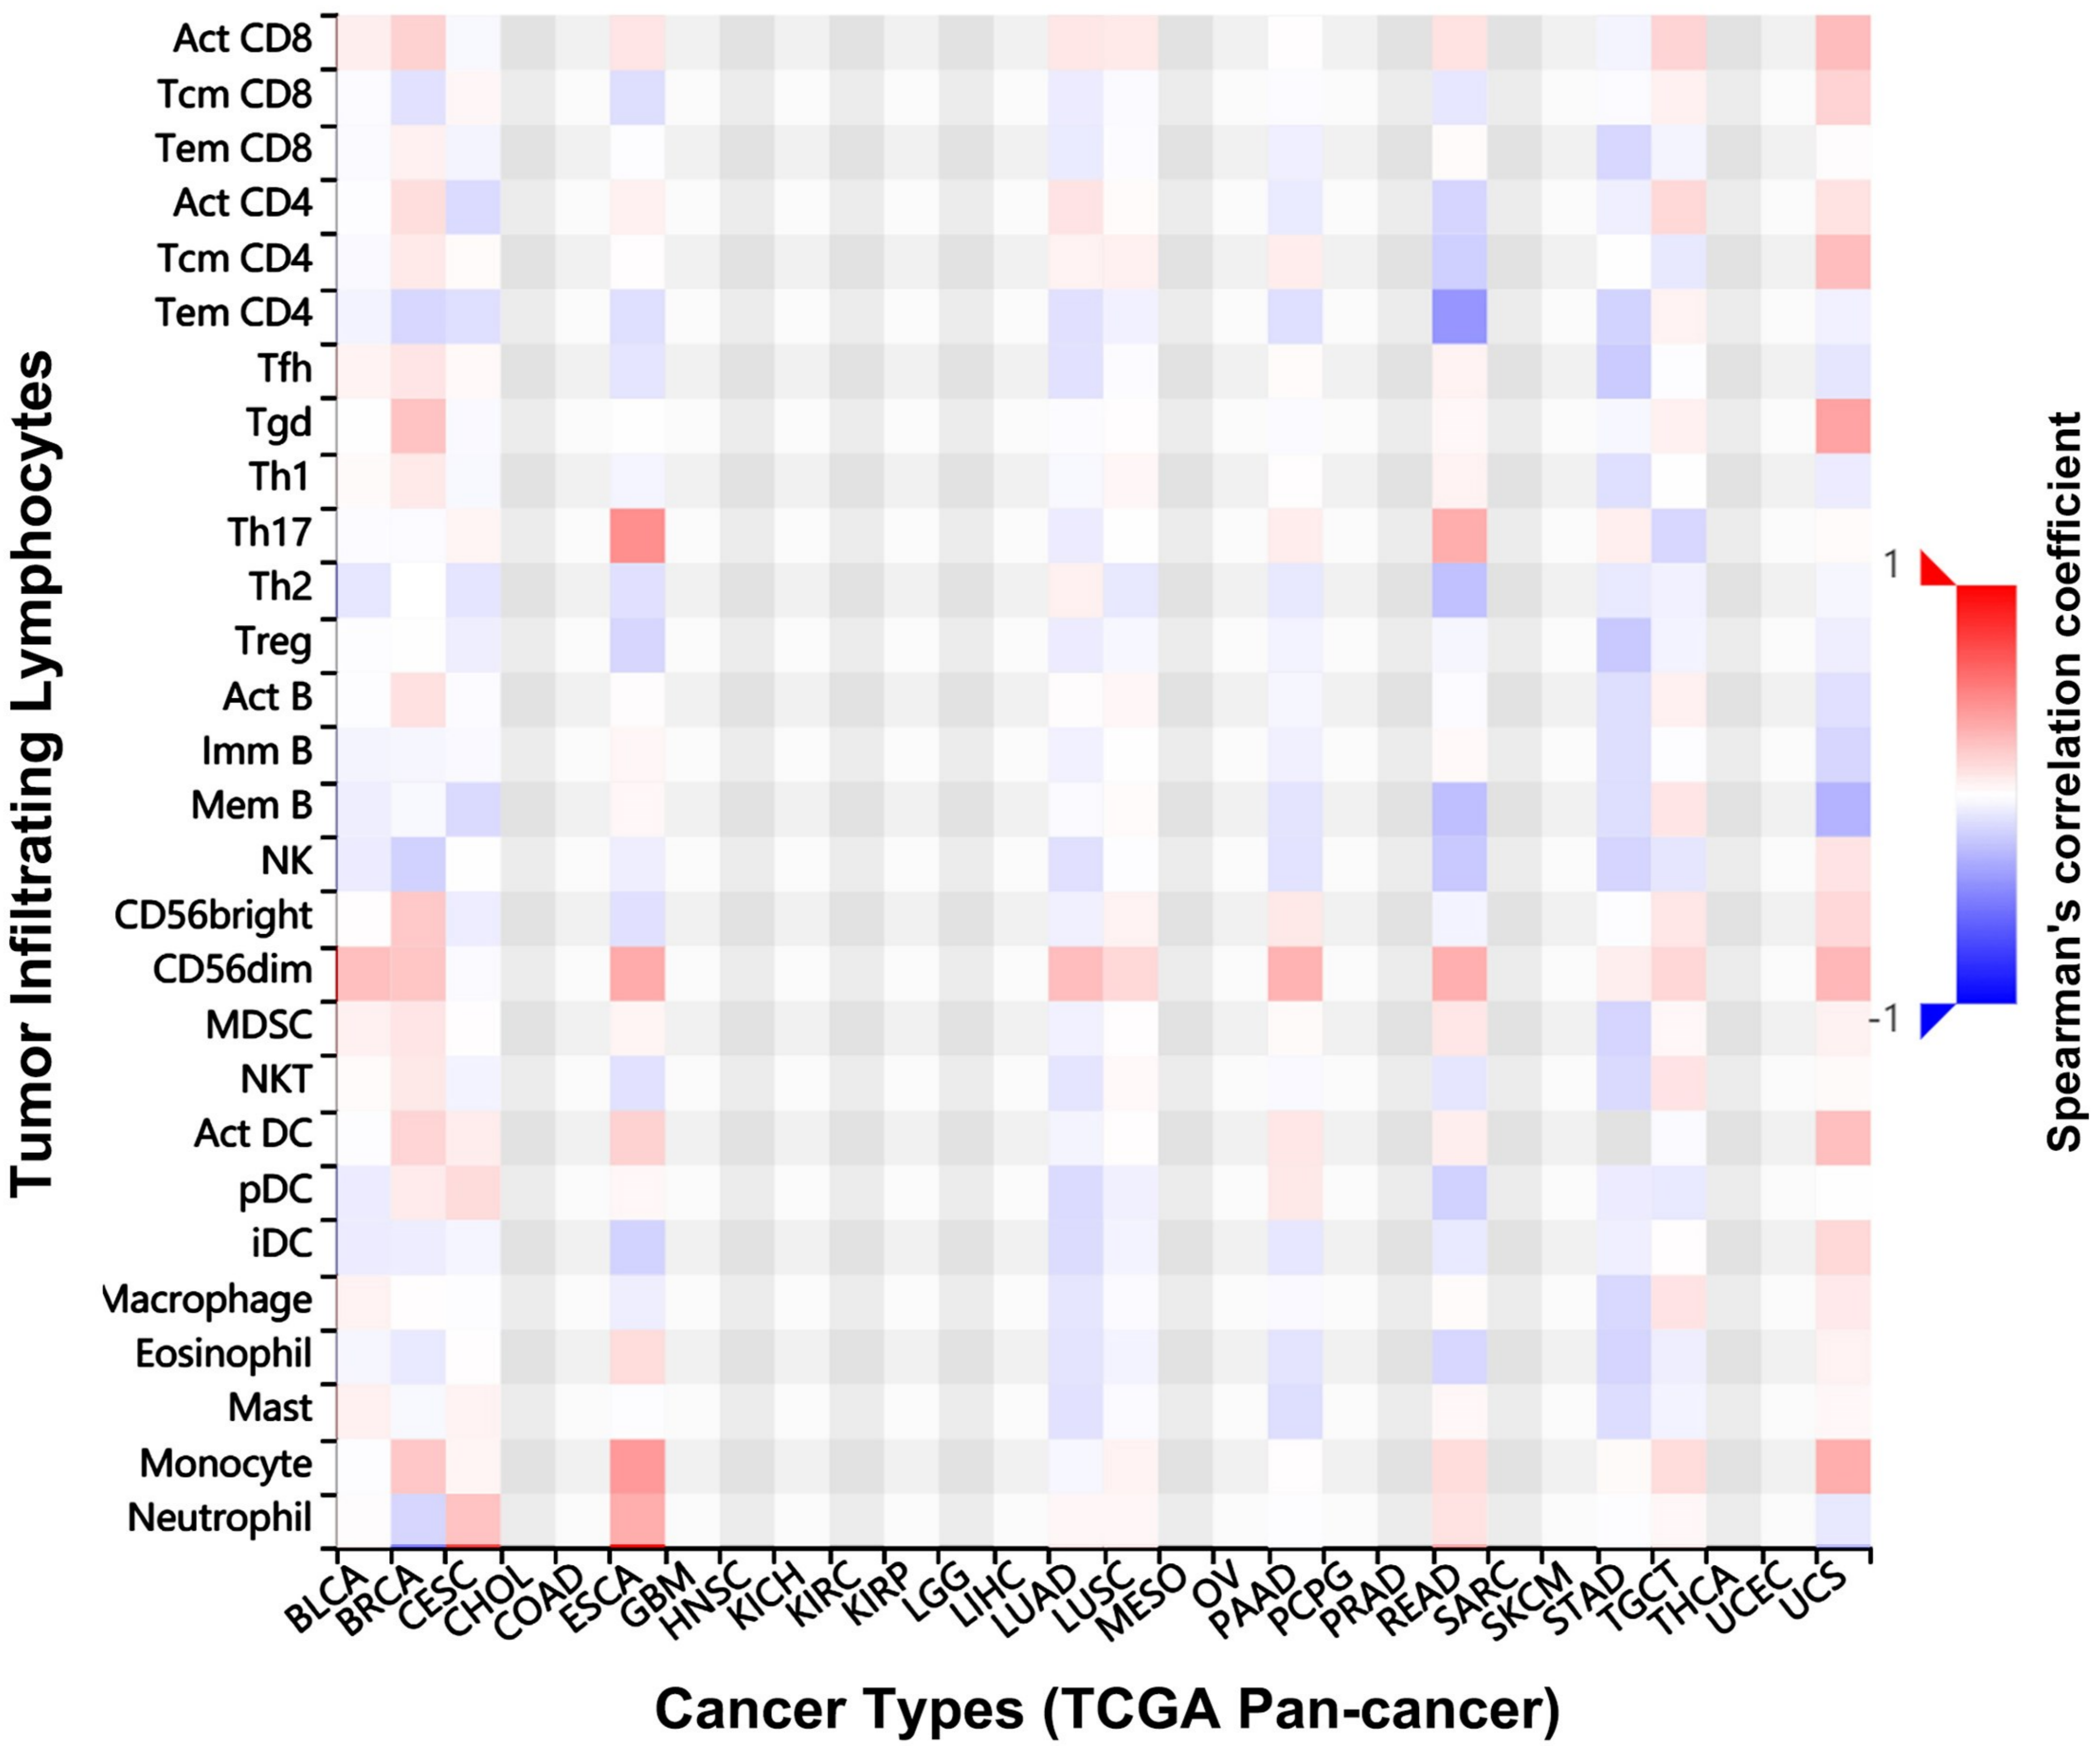

# Figure S3

## Strategies for screening shared core genes that are usually activated in CT83-positive breast cancer

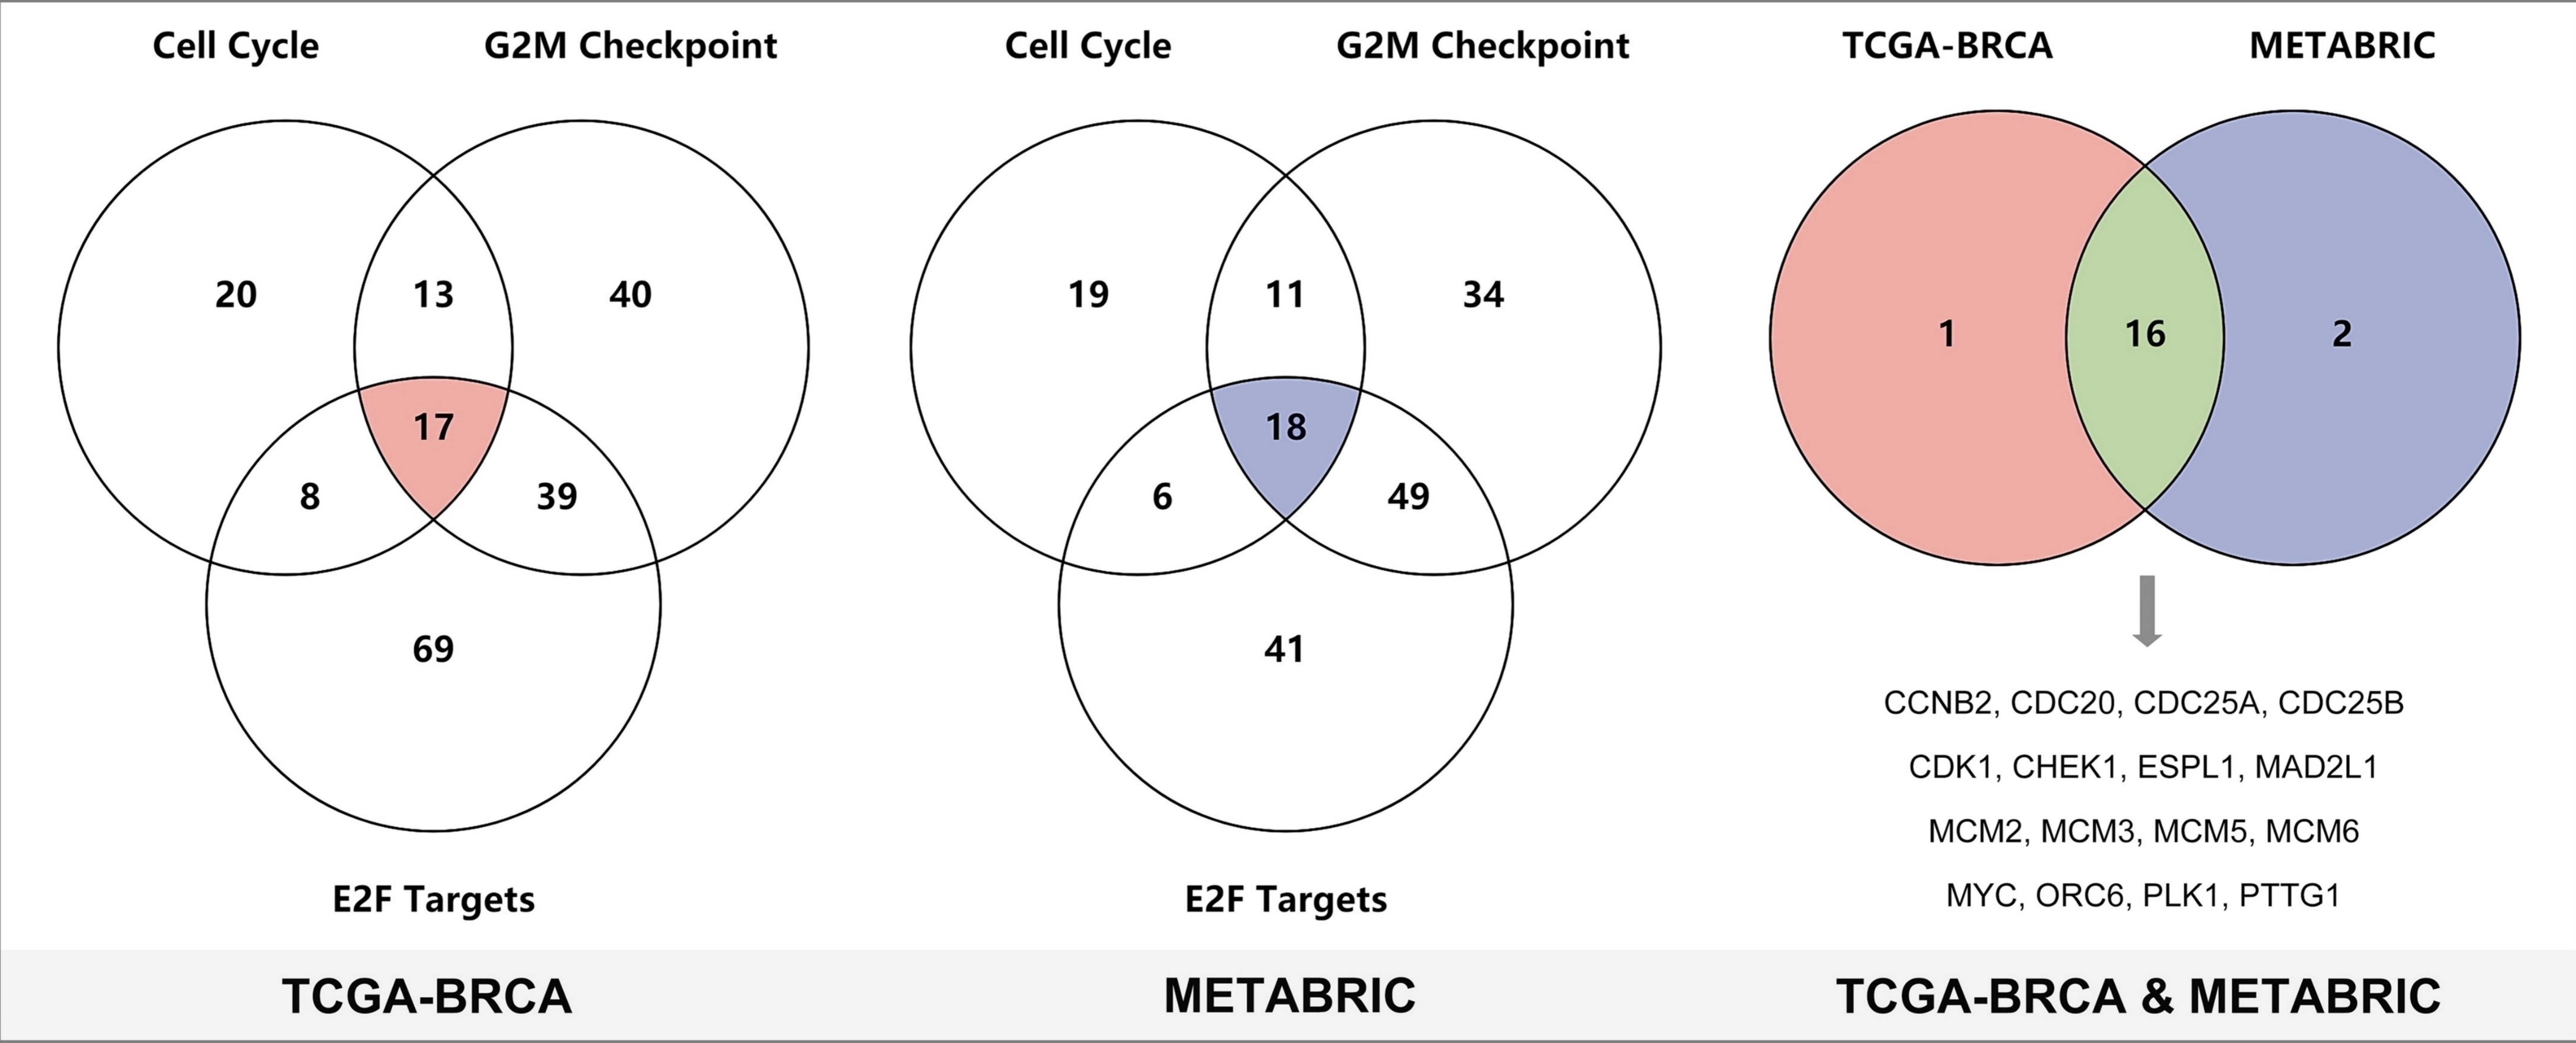

The number in each circle represents the number of **CORE ENRICHED GENES** based on the enrichment scores of GSEA results.

# Figure S4

## Heatmaps of the Expression of CT83 and its Correlated Genes in Breast Cancer

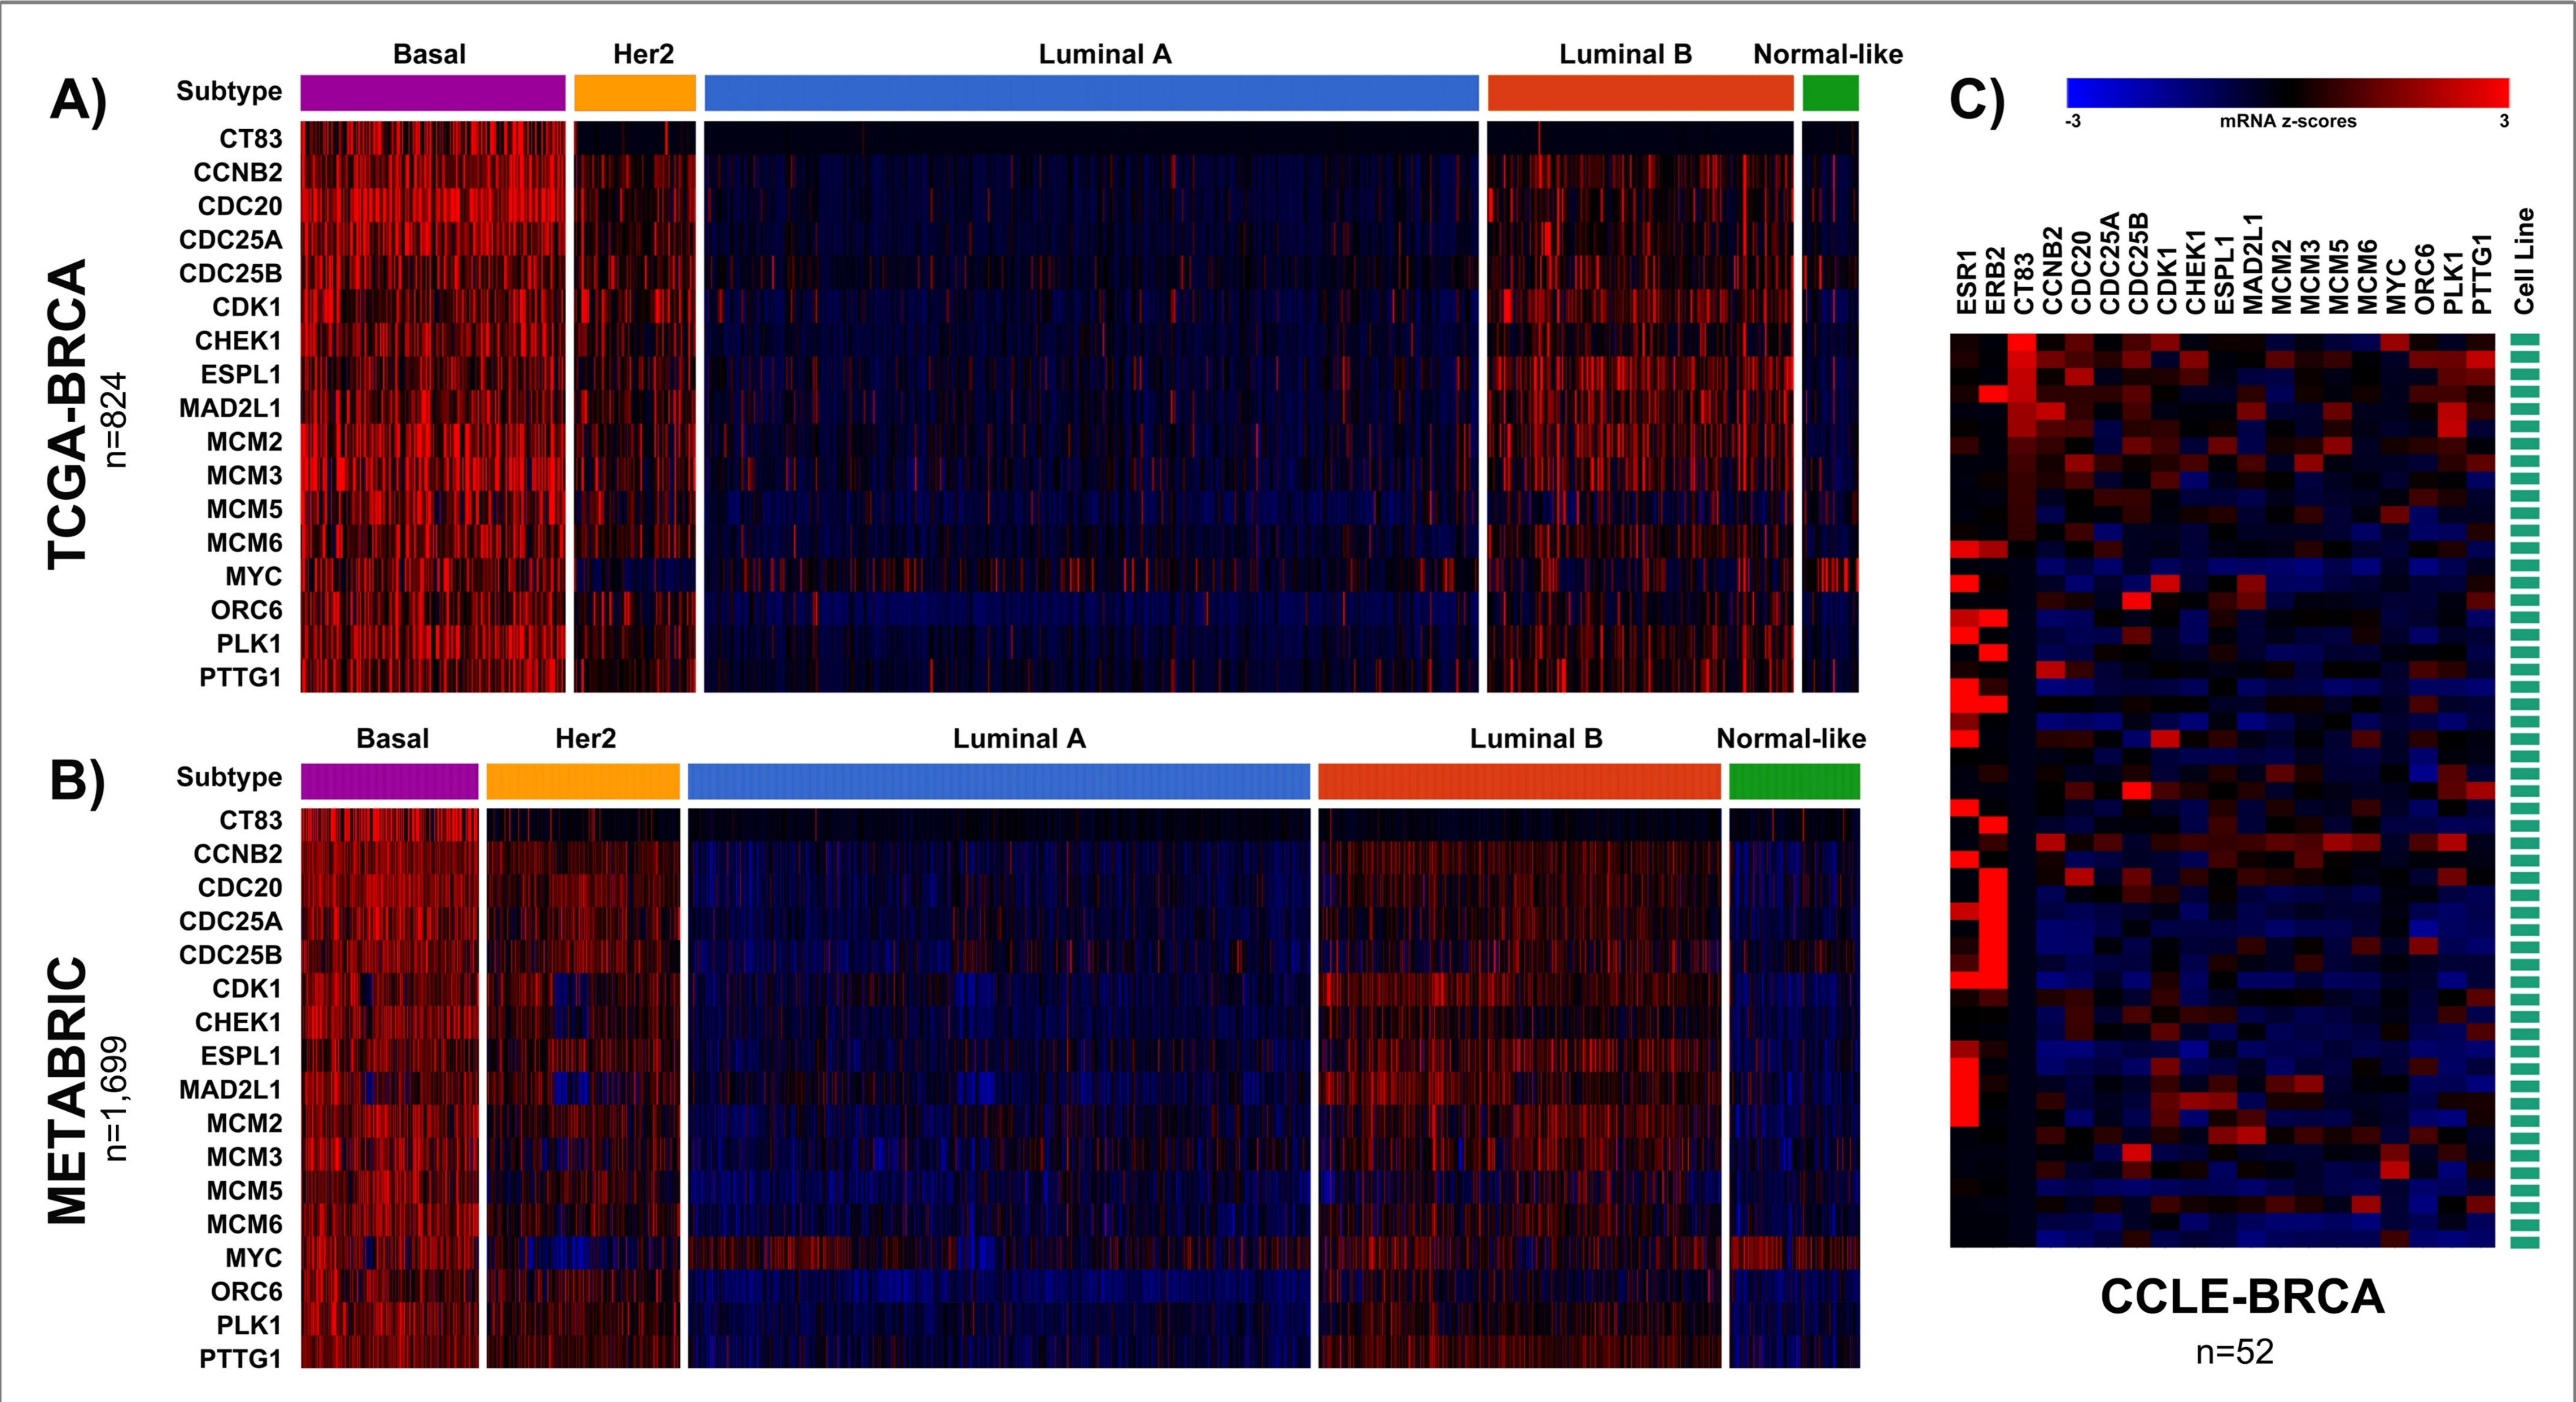

Expression of CT83 and its correlated genes in breast cancer. mRNA expression of CT83 and its 16 correlated genes in breast cancer subtypes according to the RNA-seq data of the A) TCGA-BRCA and B) METABRIC dataset. C) mRNA expression of CT83 and its 16 correlated genes in 71 breast cancer cell lines according to the RNA-seq data of CCLE-BRCA dataset.

# Figure S5

## Expression of CT83 and Its Correlated Genes in Breast Cancer

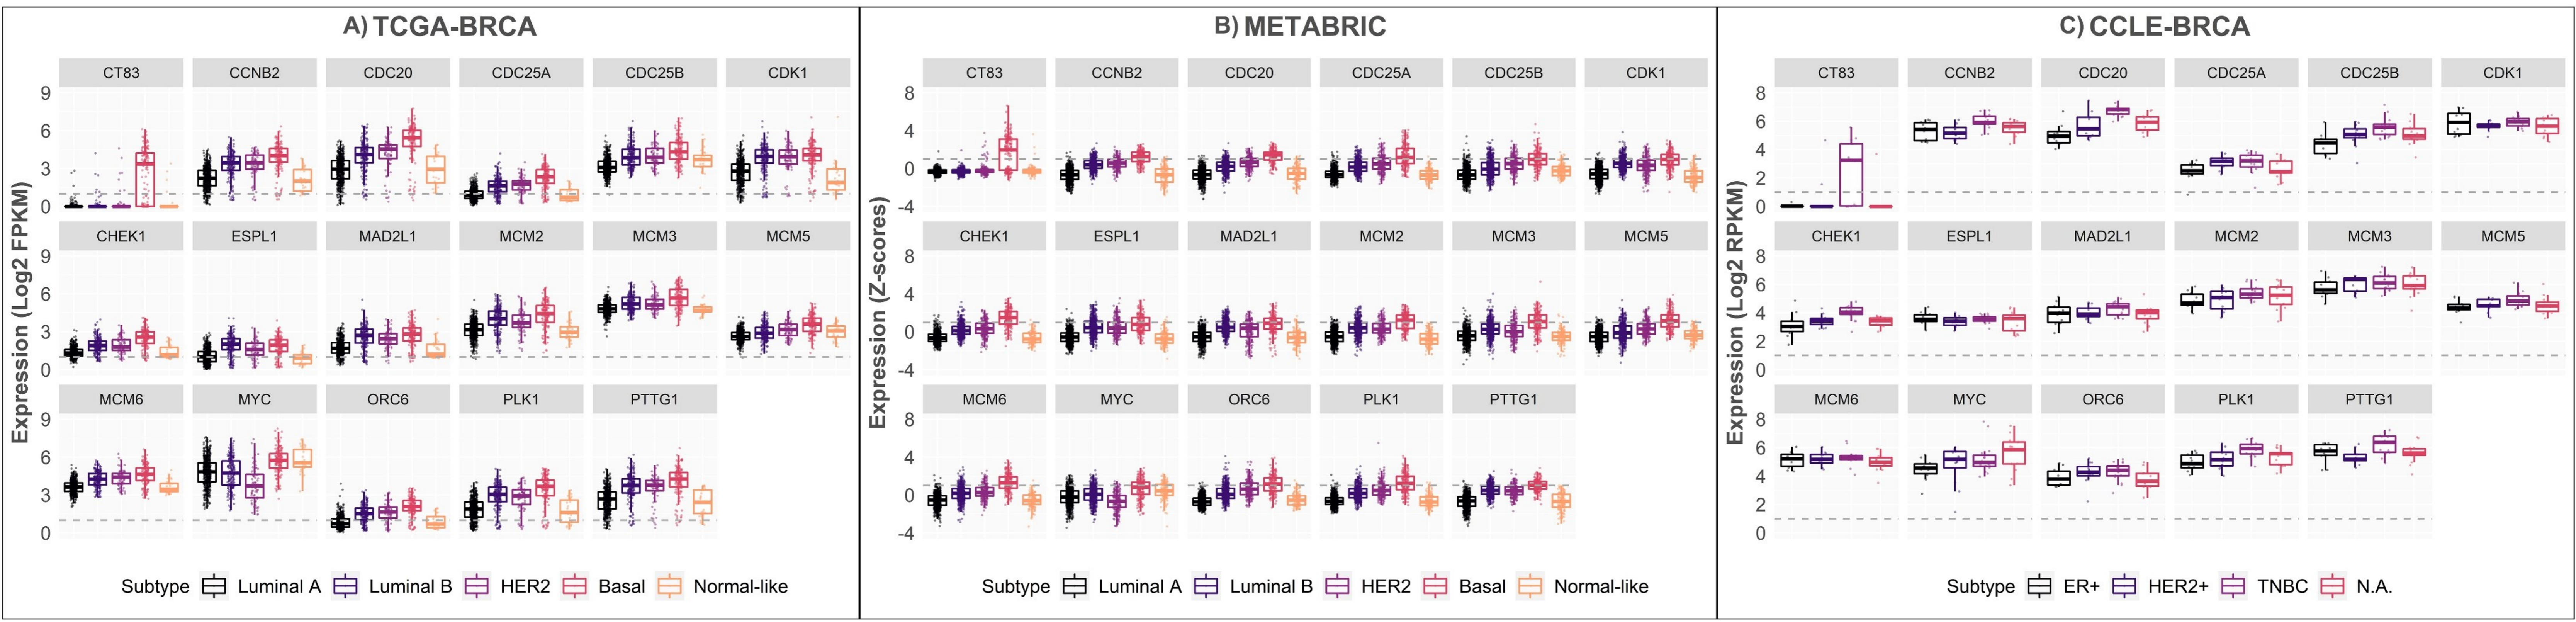

**Table S1****Top 10 Significantly Overexpressed Genes in TNBC**

|                                      | Gene         | Luminal A | Luminal B | Her2  | Basal | Normal | Max in non-TNBC |
|--------------------------------------|--------------|-----------|-----------|-------|-------|--------|-----------------|
| <b>TCGA-BRCA</b><br>(Median FPKM)    | CT83         | 0.00      | 0.00      | 0.00  | 10.44 | 0.00   | 0.00            |
|                                      | RP11-19E11.1 | 0.04      | 0.02      | 0.08  | 6.53  | 0.18   | 0.18            |
|                                      | FOXCUT       | 0.05      | 0.00      | 0.04  | 6.14  | 0.40   | 0.40            |
|                                      | HORMAD1      | 0.03      | 0.03      | 0.04  | 5.77  | 0.04   | 0.04            |
|                                      | A2ML1        | 0.04      | 0.05      | 0.40  | 4.82  | 0.12   | 0.40            |
|                                      | GAL          | 0.31      | 0.33      | 0.70  | 4.05  | 0.37   | 0.70            |
|                                      | PCSK1N       | 0.25      | 0.11      | 0.31  | 3.81  | 0.23   | 0.31            |
|                                      | ARL9         | 0.39      | 0.53      | 0.66  | 3.71  | 0.67   | 0.67            |
|                                      | GJB3         | 0.19      | 0.12      | 0.20  | 3.62  | 0.49   | 0.49            |
|                                      | ART3         | 0.03      | 0.02      | 0.05  | 3.09  | 0.12   | 0.12            |
| <b>METABRIC</b><br>(Median Z-scores) | VGLL1        | -0.36     | -0.42     | -0.14 | 2.46  | -0.09  | -0.09           |
|                                      | CT83         | -0.26     | -0.25     | -0.18 | 2.28  | -0.25  | -0.18           |
|                                      | UGT8         | -0.32     | -0.32     | -0.28 | 2.26  | -0.01  | -0.01           |
|                                      | CDKN2A       | -0.30     | -0.20     | -0.15 | 2.20  | -0.39  | -0.15           |
|                                      | ATL2         | -0.41     | -0.15     | -0.09 | 2.06  | -0.07  | -0.07           |
|                                      | ACTR3B       | -0.30     | -0.34     | -0.44 | 1.92  | -0.12  | -0.12           |
|                                      | HORMAD1      | -0.29     | -0.27     | -0.22 | 1.91  | -0.25  | -0.22           |
|                                      | DSC2         | -0.41     | -0.33     | -0.05 | 1.83  | 0.00   | 0.00            |
|                                      | ART3         | -0.29     | -0.30     | -0.24 | 1.77  | -0.23  | -0.23           |
|                                      | KRT16P3      | -0.35     | -0.43     | -0.11 | 1.75  | -0.15  | -0.11           |

# Table S2

## mRNA Expression, DNA Copy Number, and Copy Number Variation of CT83 in 59 Types of Breast (Cancer) Cell Lines

| Cell Line      | ATCC #    | Pathology  | CT83            | CT83             | CT83     | BrC. Subtype         | BrC. Subtype       | ESR1            | ER                   | PgR             | PgR                  | ERBB2           | ERBB2                |
|----------------|-----------|------------|-----------------|------------------|----------|----------------------|--------------------|-----------------|----------------------|-----------------|----------------------|-----------------|----------------------|
|                |           |            | CCLC mRNA, RPKM | CCLC Copy Number | CCLC CNV | Smith et al. Subtype | Smith et al. PAM50 | CCLC mRNA, RPKM | Smith et al. Protein | CCLC mRNA, RPKM | Smith et al. Protein | CCLC mRNA, RPKM | Smith et al. Protein |
| AU565          | CRL-2351  | Metastasis | 0               | -0.4949          | NC       | HER2+                | HER2               | 0               | -                    | 0               | -                    | 1519            | +++                  |
| BT-20          | HTB-19    | Primary    | 0               | 1.0873           | AMP      | TNBC                 | Basal A            | 1               | -                    | 0               | -                    | 33              | +                    |
| BT-474         | HTB-20    | Primary    | 0               | -0.5108          | NC       | HER2+                | HER2               | 7               | +                    | 44              | +++                  | 796             | +++                  |
| BT-483         | HTB-121   | Primary    | 0               | 0.0075           | NC       | ER+                  | Luminal B          | 12              | +                    | 0               | -                    | 133             | ++                   |
| BT-549         | HTB-122   | Primary    | 0               | 0.6944           | NC       | TNBC                 | Basal B            | 0               | -                    | 0               | -                    | 8               | +/-                  |
| CAL-120        |           | Metastasis | 0               | 0.0098           | NC       |                      |                    | 0               |                      | 0               |                      | 11              |                      |
| CAL-148        |           | Metastasis | 0               | 0.0016           | NC       |                      |                    | 0               |                      | 0               |                      | 111             |                      |
| CAL-51         |           | Metastasis | 0               | -0.0320          | NC       |                      |                    | 0               |                      | 0               |                      | 36              |                      |
| CAL-85-1       |           | Primary    | 0               | 0.7327           | AMP      |                      |                    | 0               |                      | 0               |                      | 24              |                      |
| CAMA-1         | HTB-21    | Metastasis | 0               | -0.0062          | NC       | ER+                  | Luminal A          | 9               | +                    | 6               | +                    | 36              | +                    |
| DU4475         | HTB-123   | Metastasis | 0               | 0.0056           | NC       | TNBC                 |                    | 0               | -                    | 0               | -                    | 4               | -                    |
| EFM-19         |           | Metastasis | 0               | 0.1858           | NC       |                      |                    | 18              |                      | 14              |                      | 87              |                      |
| EFM-192A       |           | Metastasis | 0               | 0.0012           | NC       |                      |                    | 2               |                      | 0               |                      | 1518            |                      |
| HCC1143        | HCC1143   | Primary    | 12              | 0.8862           | AMP      |                      |                    | 2               |                      | 0               |                      | 16              |                      |
| HCC1187        | CRL-2322  | Primary    | 0               | 0.7196           | AMP      | TNBC                 | Basal A            | 0               | -                    | 0               | -                    | 49              | +                    |
| HCC1395        | CRL-2324  | Primary    | 20              | 0.5679           | NC       | TNBC                 | Basal B            | 0               | -                    | 0               | -                    | 7               | +/-                  |
| HCC1419        | CRL-2326  | Primary    | 0               | 0.0227           | NC       | HER2+                | HER2               | 5               | +                    | 0               | -                    | 1529            | +++                  |
| HCC1428        | CRL-2327  | Metastasis | 0               | -0.0451          | NC       | ER+                  | Luminal A          | 24              | ++                   | 11              | -                    | 19              | +/-                  |
| HCC1500        | CRL-2329  | Primary    | 0               | 0.0527           | NC       | ER+                  | Luminal A          | 38              | +++                  | 8               | +                    | 20              | +/-                  |
| HCC1569        | CRL-2330  | Primary    | 0               | -0.0851          | NC       | HER2+                | HER2               | 0               | -                    | 0               | -                    | 998             | +++                  |
| HCC1599        | CRL-2331  | Primary    | 46              | 1.1759           | AMP      | TNBC                 | Basal A            | 1               | -                    | 0               | -                    | 22              | -                    |
| HCC1806        | CRL-2335  | Primary    | 8               | -0.0001          | NC       | TNBC                 | Basal A            | 1               | -                    | 0               | -                    | 20              | -                    |
| HCC1937        | CRL-2336  | Primary    | 26              | -0.3094          | NC       | TNBC                 | Basal A            | 1               | -                    | 0               | -                    | 23              | -                    |
| HCC1954        | CRL-2338  | Primary    | 24              | -0.0132          | NC       | HER2+                | HER2               | 1               | -                    | 0               | -                    | 1714            | +++                  |
| HCC202         | CRL-2316  | Primary    | 0               | -1.1648          | DEL      | HER2+                | HER2               | 0               | -                    | 0               | -                    | 1073            | +++                  |
| HCC2157        | CRL-2340  | Primary    | 8               | -0.2729          | NC       | TNBC                 | Basal A            | 0               | -                    | 0               | -                    | 47              | +                    |
| HCC2218        | CRL-2343  | Primary    | 0               | 0.0093           | NC       | HER2+                | HER2               | 0               | -                    | 0               | -                    | 1157            | +++                  |
| HCC38          | CRL-2314  | Primary    | 9               | 1.0248           | AMP      | TNBC                 | Basal B            | 0               | -                    | 0               | -                    | 58              | +                    |
| HCC70          | CRL-2315  | Primary    | 19              | 0.2916           | NC       | TNBC                 | Basal A            | 1               | -                    | 0               | -                    | 19              | +/-                  |
| HDQ-P1         |           | Primary    | 0               | 0.0366           | NC       |                      |                    | 1               |                      | 0               |                      | 27              |                      |
| HMC-1-8        |           | Metastasis | 0               | 0.0934           | NC       |                      |                    | 0               |                      | 0               |                      | 6               |                      |
| HMEL           |           |            | 0               | 0.0037           | NC       |                      |                    | 0               |                      | 0               |                      | 20              |                      |
| Hs 274.T       | CRL-7222  | Primary    | 0               | 0.0066           | NC       |                      |                    | 0               |                      | 0               |                      | 14              |                      |
| JIMT-1         |           | Metastasis | 0               | 0.1292           | NC       |                      |                    | 1               |                      | 0               |                      | 179             |                      |
| KPL-1          |           | Metastasis | 0               | 0.3295           | NC       |                      |                    | 9               |                      | 0               |                      | 26              |                      |
| MCF7           | HTB-22    | Metastasis | 0               | 0.4003           | NC       | ER+                  | Luminal A          | 18              | ++                   | 4               | +/-                  | 24              | -                    |
| MDA-MB-134-VI  | HTB-23    | Metastasis | 0               | 0.0308           | NC       | ER+                  | Luminal A          | 39              | ++                   | 1               | -                    | 11              | -                    |
| MDA-MB-157     | HTB-24    | Metastasis | 0               | -0.1164          | NC       | TNBC                 | Basal B            | 0               | +/-                  | 0               | -                    | 10              | -                    |
| MDA-MB-175-VII | HTB-25    | Metastasis | 0               | 0.0006           | NC       | ER+                  | Luminal B          | 4               | +/-                  | 0               | -                    | 94              | +                    |
| MDA-MB-231     | HTB-26    | Metastasis | 10              | -0.2376          | NC       | TNBC                 | Basal B            | 0               | -                    | 0               | -                    | 12              | -                    |
| MDA-MB-361     | HTB-27    | Metastasis | 2               | -0.7120          | DEL      | HER2+                | HER2               | 6               | ++                   | 1               | -                    | 362             | ++                   |
| MDA-MB-415     | HTB-128   | Metastasis | 0               | 0.0230           | NC       | ER+                  | Luminal A          | 4               | +/-                  | 1               | -                    | 31              | +/-                  |
| MDA-MB-436     | HTB-130   | Metastasis | 9               | 0.1899           | NC       | TNBC                 | Basal B            | 0               | -                    | 0               | -                    | 7               | -                    |
| MDA-MB-453     | HTB-131   | Metastasis | 0               | -0.1366          | NC       | TNBC                 | Basal A            | 0               | -                    | 0               | -                    | 148             | +                    |
| MDA-MB-468     | HTB-132   | Metastasis | 24              | 0.2932           | NC       | TNBC                 | Basal A            | 1               | -                    | 0               | -                    | 11              | -                    |
| SK-BR-3        | HTB-30    | Metastasis | 0               | -0.5219          | NC       | HER2+                | HER2               | 0               | -                    | 0               | -                    | 1011            | +++                  |
| T-47D          | HTB-133   | Metastasis | 0               | -0.3782          | NC       | ER+                  | Luminal A          | 19              | ++                   | 70              | +++                  | 43              | +/-                  |
| UACC-812       | CRL-1897  | Primary    | 0               | 0.1306           | NC       | HER2+                | HER2               | 9               | -                    | 11              | -                    | 1162            | +++                  |
| UACC-893       | CRL-1902  | Primary    | 0               | 0.3740           | NC       | HER2+                | HER2               | 1               | -                    | 0               | -                    | 1652            | +++                  |
| ZR-75-1        | CRL-1500  | Metastasis | 0               | 0.0227           | NC       | ER+                  | Luminal A          | 12              | +/-                  | 20              | +/-                  | 50              | +/-                  |
| ZR-75-30       | CRL-1504  | Metastasis | 0               | 0.0143           | NC       | HER2+                | HER2               | 5               | -                    | 0               | -                    | 1401            | +++                  |
| 184B5          | CRL-8799  |            |                 |                  |          | N                    |                    |                 |                      |                 |                      |                 |                      |
| MCF-10A        | CRL-10317 |            |                 |                  |          | N                    | Basal B            |                 |                      |                 |                      |                 |                      |
| MCF-10F        | CRL-10318 |            |                 |                  |          | N                    | Basal B            |                 |                      |                 |                      |                 |                      |
| MCF-12A        | CRL-10782 |            |                 |                  |          | N                    |                    |                 |                      |                 |                      |                 |                      |
| Hs 578T        | HTB-126   | Primary    | 0               | -0.1530          | NC       | TNBC                 | Basal B            |                 |                      |                 |                      |                 |                      |
| MDA-kb2        | CRL-2713  |            |                 |                  |          | TNBC                 | Basal A            |                 |                      |                 |                      |                 | ++                   |



# Table S3

## CT83 Mutations in Cancer

| Study                                                                                    | Sample ID                                      | Cancer Type                      | Protein Change | Mutation Type     | Variant Type | Copy #  | Chromosome | Start Pos | End Pos   | Ref | Var |
|------------------------------------------------------------------------------------------|------------------------------------------------|----------------------------------|----------------|-------------------|--------------|---------|------------|-----------|-----------|-----|-----|
| Skin Cutaneous Melanoma (TCGA, Firehose Legacy)                                          | TCGA-EE-A2MJ-06                                | Cutaneous Melanoma               | E30K           | Missense_Mutation | SNP          | diploid | 23         | 115593162 | 115593162 | C   | T   |
| Skin Cutaneous Melanoma (TCGA, Firehose Legacy)                                          | TCGA-EE-A3J5-06                                | Cutaneous Melanoma               | R79Q           | Missense_Mutation | SNP          | diploid | 23         | 115593014 | 115593014 | C   | T   |
| Stomach Adenocarcinoma (TCGA, Firehose Legacy)                                           | TCGA-BR-6452-01                                | Stomach Adenocarcinoma           | S107P          | Missense_Mutation | SNP          | diploid | 23         | 115592931 | 115592931 | A   | G   |
| Lung Adenocarcinoma (TCGA, Firehose Legacy)                                              | TCGA-44-2656-01                                | Lung Adenocarcinoma              | S46Y           | Missense_Mutation | SNP          | diploid | 23         | 115593113 | 115593113 | G   | T   |
| Lung Squamous Cell Carcinoma (TCGA, Firehose Legacy)                                     | TCGA-18-3414-01                                | Lung Squamous Cell Carcinoma     | D61Y           | Missense_Mutation | SNP          | diploid | 23         | 115593069 | 115593069 | C   | A   |
| Lung Squamous Cell Carcinoma (TCGA, Firehose Legacy)                                     | TCGA-43-3394-01                                | Lung Squamous Cell Carcinoma     | R23C           | Missense_Mutation | SNP          | diploid | 23         | 115593951 | 115593951 | G   | A   |
| Skin Cutaneous Melanoma (TCGA, Firehose Legacy)                                          | TCGA-EE-A29L-06                                | Cutaneous Melanoma               | S35L           | Missense_Mutation | SNP          | diploid | 23         | 115593146 | 115593146 | G   | A   |
| Breast Invasive Carcinoma (TCGA, Firehose Legacy)                                        | TCGA-A2-A04T-01                                | Breast Invasive Ductal Carcinoma | N34H           | Missense_Mutation | SNP          | gain    | 23         | 115593150 | 115593150 | T   | G   |
| Thyroid Carcinoma (TCGA, Firehose Legacy)                                                | TCGA-EM-A2OV-01                                | Follicular Thyroid Cancer        | G102S          | Missense_Mutation | SNP          | diploid | 23         | 115592946 | 115592946 | C   | T   |
| Prostate Adenocarcinoma (TCGA, Firehose Legacy)                                          | TCGA-XK-AAIW-01                                | Prostate Adenocarcinoma          | R22H           | Missense_Mutation | SNP          | diploid | 23         | 115593953 | 115593953 | C   | T   |
| Colorectal Adenocarcinoma (TCGA, Firehose Legacy)                                        | TCGA-AA-3864-01                                | Colon Adenocarcinoma             | E88G           | Missense_Mutation | SNP          | diploid | 23         | 115592987 | 115592987 | T   | C   |
| Skin Cutaneous Melanoma (TCGA, Firehose Legacy)                                          | TCGA-ER-A19G-06                                | Cutaneous Melanoma               | R22C           | Missense_Mutation | SNP          | gain    | 23         | 115593954 | 115593954 | G   | A   |
| Skin Cutaneous Melanoma (TCGA, Firehose Legacy)                                          | TCGA-EE-A20H-06                                | Cutaneous Melanoma               | E95K           | Missense_Mutation | SNP          | diploid | 23         | 115592967 | 115592967 | C   | T   |
| Adrenocortical Carcinoma (TCGA, Firehose Legacy)                                         | TCGA-OR-A5KB-01                                | Adrenocortical Carcinoma         | A8T            | Missense_Mutation | SNP          | gain    | 23         | 115593996 | 115593996 | C   | T   |
| Cervical Squamous Cell Carcinoma and Endocervical Adenocarcinoma (TCGA, Firehose Legacy) | TCGA-FU-A3HZ-01                                | Cervical Squamous Cell Carcinoma | N83T           | Missense_Mutation | SNP          | diploid | 23         | 115593002 | 115593002 | T   | G   |
| Cancer Cell Line Encyclopedia (Broad, 2019)                                              | HEC1_ENDOMETRIUM                               | Mixed Cancer Types               | R22H           | Missense_Mutation | SNP          |         | 23         | 115593953 | 115593953 | C   | T   |
| Cancer Cell Line Encyclopedia (Broad, 2019)                                              | SF268_CENTRAL_NERVOUS_SYSTEM                   | Mixed Cancer Types               | N68D           | Missense_Mutation | SNP          | diploid | 23         | 115593048 | 115593048 | T   | C   |
| Cancer Cell Line Encyclopedia (Broad, 2019)                                              | HEC251_ENDOMETRIUM                             | Mixed Cancer Types               | D61N           | Missense_Mutation | SNP          | diploid | 23         | 115593069 | 115593069 | C   | T   |
| Cancer Cell Line Encyclopedia (Broad, 2019)                                              | KARPAS1106P_HAEMATOPOIETIC_AND_LYMPHOID_TISSUE | Mixed Cancer Types               | D61N           | Missense_Mutation | SNP          |         | 23         | 115593069 | 115593069 | C   | T   |
| Cancer Cell Line Encyclopedia (Broad, 2019)                                              | K2_SKIN                                        | Mixed Cancer Types               | D61N           | Missense_Mutation | SNP          |         | 23         | 115593069 | 115593069 | C   | T   |
| Cancer Cell Line Encyclopedia (Broad, 2019)                                              | NCIH1944_LUNG                                  | Mixed Cancer Types               | N89K           | Missense_Mutation | SNP          | diploid | 23         | 115592983 | 115592983 | G   | T   |
| Cancer Cell Line Encyclopedia (Broad, 2019)                                              | GCT_SOFT_TISSUE                                | Mixed Cancer Types               | D65N           | Missense_Mutation | SNP          | diploid | 23         | 115593057 | 115593057 | C   | T   |
| Cancer Cell Line Encyclopedia (Broad, 2019)                                              | RXF393_KIDNEY                                  | Mixed Cancer Types               | L48*           | Nonsense_Mutation | SNP          |         | 23         | 115593107 | 115593107 | A   | C   |

# Table S4

## CT83 and Immune Infiltration in Breast Cancer

| Infiltrates                             | Breast Cancer<br>n = 1,100 |          | Luminal A<br>n = 568 |        | Luminal B<br>n = 219 |        | Her2<br>n = 82 |        | Basal<br>n = 191 |        | Infiltrates                                    | Breast Cancer<br>n = 1,100 |          | Luminal A<br>n = 568 |        | Luminal B<br>n = 219 |        | Her2<br>n = 82 |        | Basal<br>n = 191 |        | Infiltrates                                | Breast Cancer<br>n = 1,100 |          | Luminal A<br>n = 568 |        | Luminal B<br>n = 219 |        | Her2<br>n = 82 |        | Basal<br>n = 191 |        |
|-----------------------------------------|----------------------------|----------|----------------------|--------|----------------------|--------|----------------|--------|------------------|--------|------------------------------------------------|----------------------------|----------|----------------------|--------|----------------------|--------|----------------|--------|------------------|--------|--------------------------------------------|----------------------------|----------|----------------------|--------|----------------------|--------|----------------|--------|------------------|--------|
|                                         | Spearman's                 | P        | Spearman's           | P      | Spearman's           | P      | Spearman's     | P      | Spearman's       | P      |                                                | Spearman's                 | P        | Spearman's           | P      | Spearman's           | P      | Spearman's     | P      | Spearman's       | P      |                                            | Spearman's                 | P        | Spearman's           | P      | Spearman's           | P      | Spearman's     | P      | Spearman's       | P      |
| B cell memory_CIBERSORT                 | 0.0676                     | 0.3252   | 0.0286               | 0.7905 | 0.0586               | 0.7464 | -0.1127        | 0.6910 | -0.1817          | 0.2385 | Macrophage M2_TIDE                             | -0.2322                    | 0.0000 * | -0.0183              | 0.8697 | -0.0758              | 0.5918 | -0.0088        | 0.9768 | -0.0825          | 0.5799 | NK cell_QUANTISEQ                          | 0.1152                     | 0.0087 * | -0.0017              | 0.9929 | 0.0343               | 0.8751 | -0.0388        | 0.9044 | -0.0873          | 0.6575 |
| B cell memory_CIBERSORT-ABS             | 0.0747                     | 0.2412   | 0.0329               | 0.7560 | 0.0531               | 0.7660 | -0.1213        | 0.6601 | -0.1612          | 0.3252 | Macrophage M2_XCELL                            | -0.1594                    | 0.0000 * | -0.0573              | 0.4955 | 0.0594               | 0.7057 | -0.0154        | 0.9601 | -0.1157          | 0.4061 | NK cell_XCELL                              | 0.0260                     | 0.7777   | 0.0122               | 0.9162 | 0.1080               | 0.5562 | -0.0054        | 0.9925 | 0.0277           | 0.8960 |
| B cell memory_XCELL                     | 0.2129                     | 0.0000 * | 0.1068               | 0.2363 | -0.0767              | 0.6521 | -0.0103        | 0.9935 | 0.0227           | 0.9226 | Macrophage/Monocyte_MCPCOUNTER                 | 0.3279                     | 0.0000 * | -0.0902              | 1.2406 | 0.2366               | 0.7745 | 0.0608         | 1.8735 | -0.2386          | 0.8024 | Plasmacytoid dendritic cell_XCELL          | 0.2178                     | 0.0000 * | 0.0317               | 0.7795 | 0.0662               | 0.7525 | 0.0523         | 0.8811 | 0.0535           | 0.7795 |
| B cell naive_CIBERSORT                  | -0.0341                    | 0.6410   | 0.0442               | 0.6601 | -0.0900              | 0.6035 | 0.1920         | 0.5000 | 0.1570           | 0.3373 | Macrophage_EPIC                                | 0.0582                     | 0.3206   | -0.0402              | 0.6496 | -0.0104              | 0.9556 | 0.0074         | 0.9818 | -0.0529          | 0.7588 | T cell CD4+ (non-regulatory)_QUANTISEQ     | -0.3387                    | 0.0000 * | 0.0282               | 0.8742 | -0.1699              | 0.2012 | 0.0075         | 0.9874 | -0.1268          | 0.4663 |
| B cell naive_CIBERSORT-ABS              | 0.0128                     | 0.8933   | 0.0865               | 0.3510 | -0.0754              | 0.6569 | 0.1854         | 0.5116 | 0.1178           | 0.5116 | Macrophage_TIMER                               | -0.2167                    | 0.0000 * | -0.1276              | 0.0750 | -0.0345              | 0.8498 | 0.0145         | 0.9616 | -0.0939          | 0.5234 | T cell CD4+ (non-regulatory)_XCELL         | 0.0322                     | 0.7552   | 0.0297               | 0.8645 | 0.0326               | 0.9033 | 0.0095         | 0.8396 | -0.0629          | 0.8396 |
| B cell naive_XCELL                      | 0.1982                     | 0.0000 * | 0.1061               | 0.2367 | 0.0639               | 0.7211 | -0.0063        | 0.9953 | 0.1259           | 0.4884 | Macrophage_XCELL                               | 0.0482                     | 0.4061   | -0.0257              | 0.8098 | 0.0359               | 0.8433 | -0.0120        | 0.9694 | -0.0921          | 0.5360 | T cell CD4+ central memory_XCELL           | -0.0896                    | 0.0831   | 0.0671               | 0.4909 | -0.1847              | 0.1396 | -0.0504        | 0.9033 | -0.0645          | 0.8396 |
| B cell plasma_CIBERSORT                 | 0.0614                     | 0.3574   | 0.0603               | 0.5620 | 0.0408               | 0.8238 | 0.0877         | 0.7660 | 0.1438           | 0.3700 | Mast cell activated_CIBERSORT                  | -0.3533                    | 0.0000 * | -0.1116              | 0.1606 | 0.0522               | 0.7351 | -0.0825        | 0.7462 | -0.1214          | 0.4048 | T cell CD4+ effector memory_XCELL          | -0.1514                    | 0.0001 * | 0.0696               | 0.4866 | -0.0738              | 0.7551 | -0.2682        | 0.2274 | -0.0617          | 0.8396 |
| B cell plasma_CIBERSORT-ABS             | 0.0829                     | 0.1756   | 0.0540               | 0.6044 | 0.0746               | 0.6599 | 0.1637         | 0.5620 | 0.0954           | 0.6018 | Mast cell activated_CIBERSORT-ABS              | -0.3057                    | 0.0000 * | -0.0895              | 0.2979 | 0.0822               | 0.5625 | -0.1002        | 0.6949 | -0.1216          | 0.4048 | T cell CD4+ memory activated_CIBERSORT     | 0.2119                     | 0.0000 * | 0.1259               | 0.0830 | 0.0604               | 0.8396 | 0.0684         | 0.8837 | -0.1259          | 0.4749 |
| B cell plasma_XCELL                     | 0.2131                     | 0.0000 * | 0.1190               | 0.1482 | 0.1349               | 0.3904 | 0.0972         | 0.7464 | 0.0428           | 0.8238 | Mast cell resting_CIBERSORT                    | 0.1194                     | 0.0035 * | -0.0213              | 0.7980 | -0.0211              | 0.8756 | 0.0019         | 0.9877 | 0.0155           | 0.9104 | T cell CD4+ memory activated_CIBERSORT-ABS | 0.2126                     | 0.0000 * | 0.1268               | 0.0807 | 0.0632               | 0.8334 | 0.0808         | 0.8645 | -0.1354          | 0.4530 |
| B cell_EPIC                             | 0.1479                     | 0.0003 * | 0.1008               | 0.2572 | 0.1036               | 0.5343 | 0.0263         | 0.9397 | -0.0304          | 0.8933 | Mast cell resting_CIBERSORT-ABS                | 0.1283                     | 0.0013 * | -0.0202              | 0.8126 | -0.0234              | 0.8670 | 0.0102         | 0.9551 | 0.0127           | 0.9323 | T cell CD4+ memory resting_CIBERSORT       | -0.0285                    | 0.8245   | 0.0852               | 0.3652 | 0.0291               | 0.9036 | -0.0890        | 0.8487 | 0.0230           | 0.9258 |
| B cell_MCPCOUNTER                       | 0.0819                     | 0.1814   | 0.0910               | 0.3373 | 0.0753               | 0.6569 | 0.0614         | 0.8538 | 0.0012           | 0.9954 | Mast cell_XCELL                                | -0.2861                    | 0.0000 * | -0.0627              | 0.4414 | 0.0319               | 0.8233 | -0.0996        | 0.6952 | -0.1052          | 0.4488 | T cell CD4+ memory resting_CIBERSORT-ABS   | 0.0365                     | 0.6574   | 0.0347               | 0.8397 | 0.0543               | 0.8487 | -0.0264        | 0.9341 | -0.0052          | 0.9874 |
| B cell_QUANTISEQ                        | 0.0700                     | 0.2826   | 0.0648               | 0.5280 | 0.0074               | 0.9919 | -0.0821        | 0.7808 | 0.0515           | 0.7854 | MDSC_TIDE                                      | 0.2950                     | 0.0000 * | 0.0003               | 0.9947 | -0.0068              | 0.9474 | 0.0358         | 0.8872 | 0.1367           | 0.3336 | T cell CD4+ memory_XCELL                   | 0.1392                     | 0.0006 * | 0.0434               | 0.7618 | 0.0106               | 0.9559 | 0.0472         | 0.9036 | -0.0601          | 0.8397 |
| B cell_TIMER                            | -0.0711                    | 0.2739   | 0.0289               | 0.7887 | -0.0280              | 0.8933 | 0.0005         | 0.9982 | 0.0236           | 0.9211 | Monocyte_CIBERSORT                             | -0.0635                    | 0.3470   | 0.0194               | 0.8936 | -0.0609              | 0.7248 | -0.1464        | 0.5567 | 0.0426           | 0.8510 | T cell CD4+ naive_CIBERSORT-ABS            | -0.0242                    | 0.8478   | -0.0180              | 0.9033 | -0.0238              | 0.9177 |                |        | -0.0360          | 0.9033 |
| B cell_XCELL                            | 0.2068                     | 0.0000 * | 0.1258               | 0.1083 | 0.0219               | 0.9226 | 0.0517         | 0.8830 | -0.0172          | 0.9397 | Monocyte_CIBERSORT-ABS                         | -0.0274                    | 0.7121   | 0.0290               | 0.7887 | -0.0505              | 0.7771 | -0.1893        | 0.3995 | 0.0267           | 0.9311 | T cell CD4+ naive_XCELL                    | 0.0656                     | 0.3145   | 0.0652               | 0.5142 | -0.0370              | 0.9033 | 0.1273         | 0.7186 | -0.1318          | 0.4541 |
| Cancer associated fibroblast_EPIC       | -0.2576                    | 0.0000 * | -0.0911              | 0.2810 | 0.0440               | 0.7782 | -0.2374        | 0.3032 | -0.0389          | 0.7980 | Monocyte_MCPCOUNTER                            | 0.1639                     | 0.0000 * | -0.0451              | 0.6488 | 0.1183               | 0.3854 | 0.0304         | 0.9450 | -0.1193          | 0.3995 | T cell CD4+ Th1_XCELL                      | 0.1949                     | 0.0000 * | 0.0437               | 0.7618 | -0.0381              | 0.9033 | 0.1821         | 0.4909 | 0.0196           | 0.9316 |
| Cancer associated fibroblast_MCPCOUNTER | -0.2196                    | 0.0000 * | -0.0843              | 0.3236 | 0.0537               | 0.7284 | -0.2441        | 0.2810 | -0.0683          | 0.6853 | Monocyte_QUANTISEQ                             | 0.1328                     | 0.0013 * | 0.0074               | 0.9615 | -0.0066              | 0.9753 | 0.0393         | 0.9340 | -0.0873          | 0.5882 | T cell CD4+ Th2_XCELL                      | 0.4213                     | 0.0000 * | -0.0082              | 0.9399 | 0.2053               | 0.0830 | 0.2031         | 0.4570 | 0.0380           | 0.9033 |
| Cancer associated fibroblast_TIDE       | -0.2187                    | 0.0000 * | -0.1095              | 0.1767 | 0.0692               | 0.6475 | -0.2114        | 0.3633 | -0.0094          | 0.9492 | Monocyte_XCELL                                 | 0.1290                     | 0.0020 * | 0.0864               | 0.3486 | -0.0224              | 0.9378 | -0.1165        | 0.6708 | -0.0978          | 0.5489 | T cell CD4+_EPIC                           | -0.1390                    | 0.0006 * | -0.0147              | 0.9177 | -0.0259              | 0.9121 | -0.0906        | 0.8487 | -0.1453          | 0.3678 |
| Cancer associated fibroblast_XCELL      | -0.2427                    | 0.0000 * | -0.0060              | 0.9459 | 0.0435               | 0.7782 | -0.2104        | 0.3633 | -0.1757          | 0.2123 | Myeloid dendritic cell activated_CIBERSORT     | 0.1827                     | 0.0000 * | 0.0317               | 0.7795 | 0.1201               | 0.5048 | 0.0953         | 0.7777 | 0.2090           | 0.0891 | T cell CD4+_TIMER                          | 0.1881                     | 0.0000 * | 0.1198               | 0.0979 | -0.0188              | 0.9316 | -0.0020        | 0.9960 | 0.1186           | 0.4878 |
| Class-switched memory B cell_XCELL      | 0.0509                     | 0.5000   | 0.0976               | 0.2801 | 0.0484               | 0.7867 | 0.0828         | 0.7806 | -0.1198          | 0.5116 | Myeloid dendritic cell activated_CIBERSORT-ABS | 0.1872                     | 0.0000 * | 0.0314               | 0.7795 | 0.1273               | 0.4734 | 0.1007         | 0.7777 | 0.2027           | 0.1080 | T cell CD8+ central memory_XCELL           | 0.1234                     | 0.0059 * | 0.0854               | 0.3065 | 0.0571               | 0.7788 | 0.1106         | 0.7063 | -0.0306          | 0.9031 |
| Common lymphoid progenitor_XCELL        | -0.1292                    | 0.0016 * | -0.0564              | 0.5122 | -0.0532              | 0.7624 | -0.0276        | 0.9103 | -0.0007          | 0.9928 | Myeloid dendritic cell activated_XCELL         | 0.1663                     | 0.0000 * | 0.0478               | 0.6820 | 0.0590               | 0.7777 | 0.1176         | 0.7320 | 0.0163           | 0.9351 | T cell CD8+ effector memory_XCELL          | 0.0890                     | 0.1171   | 0.0303               | 0.7981 | -0.0040              | 0.9900 | -0.0615        | 0.8683 | 0.0452           | 0.8303 |
| Common myeloid progenitor_XCELL         | -0.2110                    | 0.0000 * | -0.0629              | 0.4537 | -0.0274              | 0.8708 | -0.0551        | 0.8686 | 0.0475           | 0.8065 | Myeloid dendritic cell resting_CIBERSORT       | -0.0470                    | 0.5562   | -0.0222              | 0.8681 | -0.0315              | 0.8811 | 0.2073         | 0.4775 | -0.1359          | 0.4577 | T cell CD8+ naive_XCELL                    | 0.0326                     | 0.6635   | 0.0979               | 0.2406 | -0.0201              | 0.9305 | 0.0840         | 0.7971 | -0.0526          | 0.7981 |
| Endothelial cell_EPIC                   | -0.2213                    | 0.0000 * | -0.0873              | 0.2968 | -0.0536              | 0.8119 | -0.0961        | 0.8119 | -0.0263          | 0.9371 | Myeloid dendritic cell resting_CIBERSORT-ABS   | -0.0233                    | 0.7795   | -0.0075              | 0.9560 | -0.0196              | 0.9162 | 0.2197         | 0.4269 | -0.1173          | 0.5468 | T cell CD8+_CIBERSORT                      | 0.0301                     | 0.6977   | 0.0676               | 0.4403 | 0.0069               | 0.9758 | 0.1859         | 0.4389 | 0.0011           | 0.9962 |
| Endothelial cell_MCPCOUNTER             | -0.1691                    | 0.0000 * | -0.0971              | 0.2179 | -0.0537              | 0.8119 | -0.1368        | 0.6903 | -0.0515          | 0.8232 | Myeloid dendritic cell_MCPCOUNTER              | 0.0133                     | 0.8811   | 0.0003               | 0.9968 | 0.0516               | 0.7795 | 0.0964         | 0.7777 | -0.1816          | 0.1885 | T cell CD8+_CIBERSORT-ABS                  | 0.0888                     | 0.1171   | 0.0535               | 0.5795 | 0.0354               | 0.8806 | 0.1242         | 0.6613 | -0.0007          | 0.9962 |
| Endothelial cell_XCELL                  | -0.2009                    | 0.0000 * | -0.0830              | 0.3175 | -0.0563              | 0.8119 | -0.0903        | 0.8119 | -0.0462          | 0.8527 | Myeloid dendritic cell_QUANTISEQ               | 0.0613                     | 0.3911   | -0.0213              | 0.8732 | 0.0130               | 0.9505 | 0.0168         | 0.9685 | 0.0025           | 0.9935 | T cell CD8+_EPIC                           | 0.1108                     | 0.0215 * | 0.0541               | 0.5795 | 0.0266               | 0.9223 | 0.1309         | 0.6239 | 0.0335           | 0.8921 |
| Eosinophil_CIBERSORT                    | -0.0275                    | 0.8119   | -0.0192              | 0.9162 | -0.0422              | 0.8527 |                |        | -0.1369          | 0.3198 | Myeloid dendritic cell_TIMER                   | 0.1792                     | 0.0000 * | 0.0047               | 0.9754 | 0.0631               | 0.7777 | -0.0031        | 0.9942 | -0.0356          | 0.8776 | T cell CD8+_MCPCOUNTER                     | 0.2154                     | 0.0000 * | 0.0792               | 0.3859 | 0.0460               | 0.8173 | 0.1681         | 0.4694 | 0.0746           | 0.6779 |
| Eosinophil_CIBERSORT-ABS                | -0.0275                    | 0.8119   | -0.0192              | 0.9162 | -0.0422              | 0.8527 |                |        | -0.1378          | 0.3175 | Myeloid dendritic cell_XCELL                   | 0.1884                     | 0.0000 * | 0.0378               | 0.7777 | 0.1441               | 0.3648 | 0.1833         | 0.5468 | -0.1433          | 0.4110 | T cell CD8+_QUANTISEQ                      | 0.1589                     | 0.0001 * | 0.0888               | 0.2875 | 0.0454               | 0.8180 | 0.1647         | 0.4853 | 0.0665           | 0.7355 |
| Eosinophil_XCELL                        | 0.0878                     | 0.0790   | 0.0582               | 0.5895 | 0.0909               | 0.6110 | -0.0455        | 0.9303 | 0.0944           | 0.6110 | Neutrophil_CIBERSORT                           | 0.0316                     | 0.6651   | -0.0678              | 0.4199 | 0.0923               | 0.5489 | 0.1596         | 0.5219 | -0.0257          | 0.9330 | T cell CD8+_TIMER                          | -0.2054                    | 0.0000 * | -0.0600              | 0.4968 | -0.0175              | 0.9540 | 0.0408         | 0.9223 | -0.1224          | 0.4285 |
| Granulocyte-monocyte progenitor_XCELL   | -0.0317                    | 0.5957   | 0.0413               | 0.6201 | 0.0293               | 0.8908 | -0.1000        | 0.6632 | -0.0110          | 0.9229 | Neutrophil_CIBERSORT-ABS                       | 0.0399                     | 0.5489   | -0.0697              | 0.3995 | 0.1020               | 0.5023 | 0.1624         | 0.5214 | -0.0214          | 0.9390 | T cell CD8+_XCELL                          | 0.1319                     | 0.0023 * | 0.0944               | 0.2511 | -0.0880              | 0.5795 | -0.0307        | 0.9436 | -0.0087          | 0.9733 |
| Hematopoietic stem cell_XCELL           | -0.2315                    | 0.0000 * | -0.0444              | 0.5957 | -0.0792              | 0.5957 | -0.1869        | 0.3899 | -0.0186          | 0.9092 | Neutrophil_MCPCOUNTER                          | -0.2819                    | 0.0000 * | -0.0760              | 0.3694 | -0.0391              | 0.8677 | -0.1153        | 0.6770 | -0.0805          | 0.6465 | T cell follicular helper_CIBERSORT         | 0.1754                     | 0.0000 * |                      |        |                      |        |                |        |                  |        |
